# Supplementary material
Source: Springer Nature journal article supplement (https://www.springermedizin.de/resource/supplementary/13052_2014_374_MOESM1_ESM.pdf/9672000)
Supplement: MOESM1 [file 9672000]

**Breast-fed colicky infants**

**Propose a low allergen maternal diet**

(avoiding cow's milk and dairy food)

*after 2 weeks*

Is it effective?

Yes

No

Continue the hypoallergenic  
maternal diet

**Start taking probiotics**

*after 2 weeks*

Have colic symptoms  
improved?

Yes

No

Continue  
probiotics

Consider the administration of  
**pain relieving agents**
